# Supplementary material for: Influence of the diamine on the reactivity of thiosulfonato ruthenium complexes with hydrosulfide (HS−)
Source: Royal Society of Chemistry journal article supplement (doi:10.1039/c2dt31758c), 2012-12-13
Supplement: c2dt31758c.pdf [file c2dt31758c.pdf]

# Influence of the Diamine on the Reactivity of Thiosulfonato Ruthenium Complexes with Hydrosulfide (HS<sup>-</sup>).

*Erwan Galardon,<sup>\*a</sup> Hombeline Daguet, Patrick Deschamps,<sup>b</sup> Thomas Roger,<sup>a</sup> Pascal Roussel,<sup>c</sup> Alain  
Tomas,<sup>b</sup> and Isabelle Artaud<sup>a</sup>*

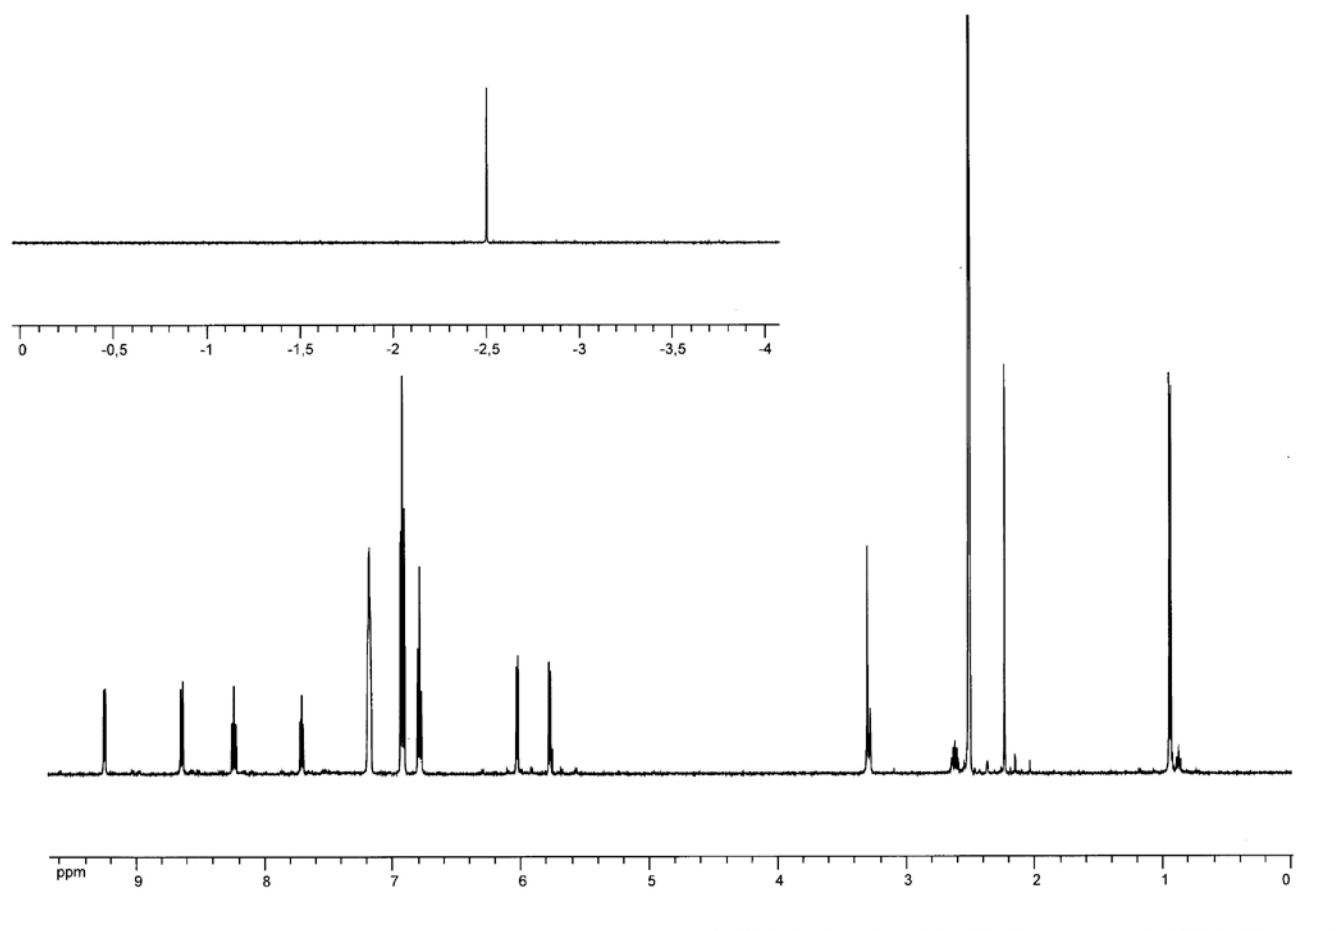

**Figure S1.** <sup>1</sup>H NMR spectra recorded at 500 MHz in DMSO-*d*<sub>6</sub> of complex **3.BPh4**.

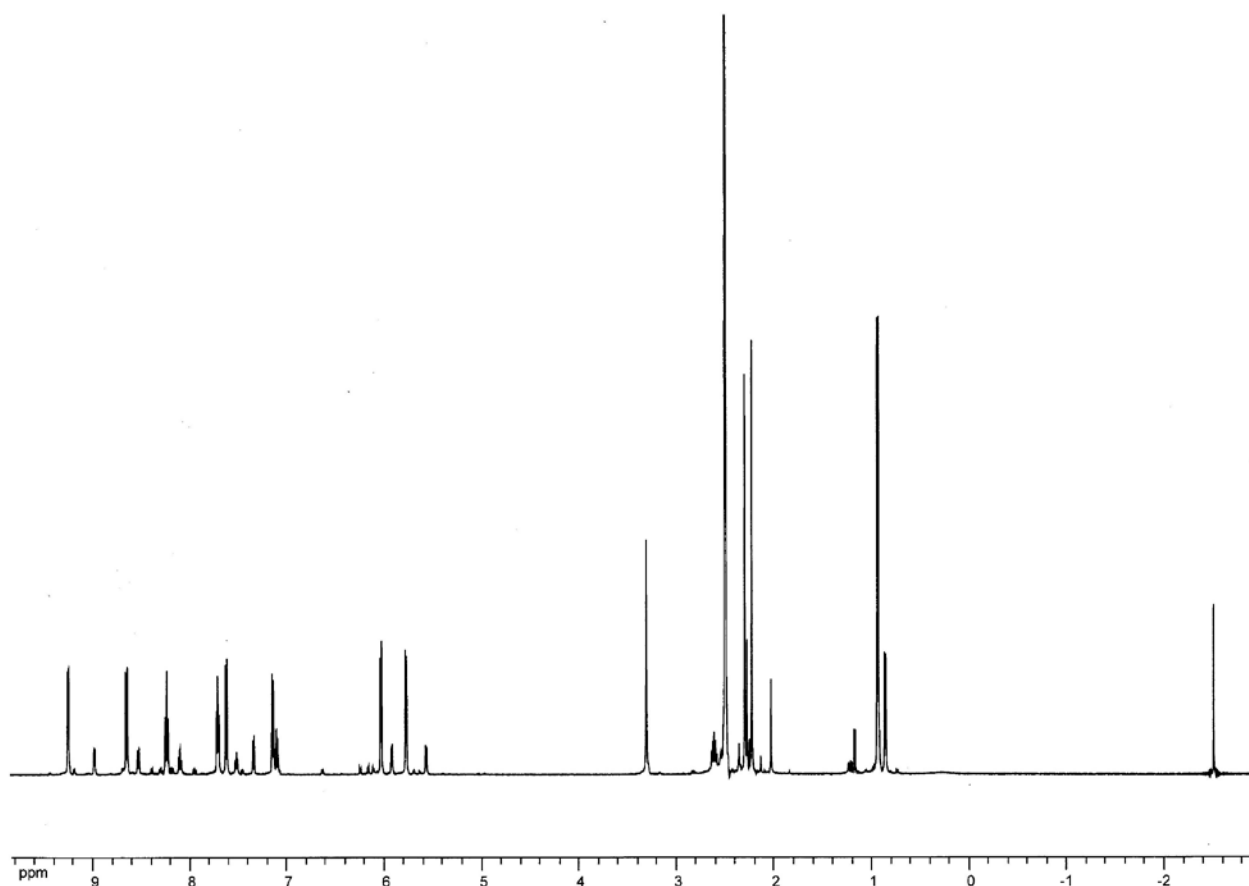

**Figure S1'.**  $^1\text{H}$  NMR spectra recorded at 500 MHz in  $\text{DMSO-}d_6$  of the crude reaction mixture yielding complex **3**.

**Figure S2.**  $^1\text{H}$  NMR spectra recorded at 250 MHz in  $\text{DMSO-}d_6$  of complex **4'**. $(\text{BPh}_4)_2$ .

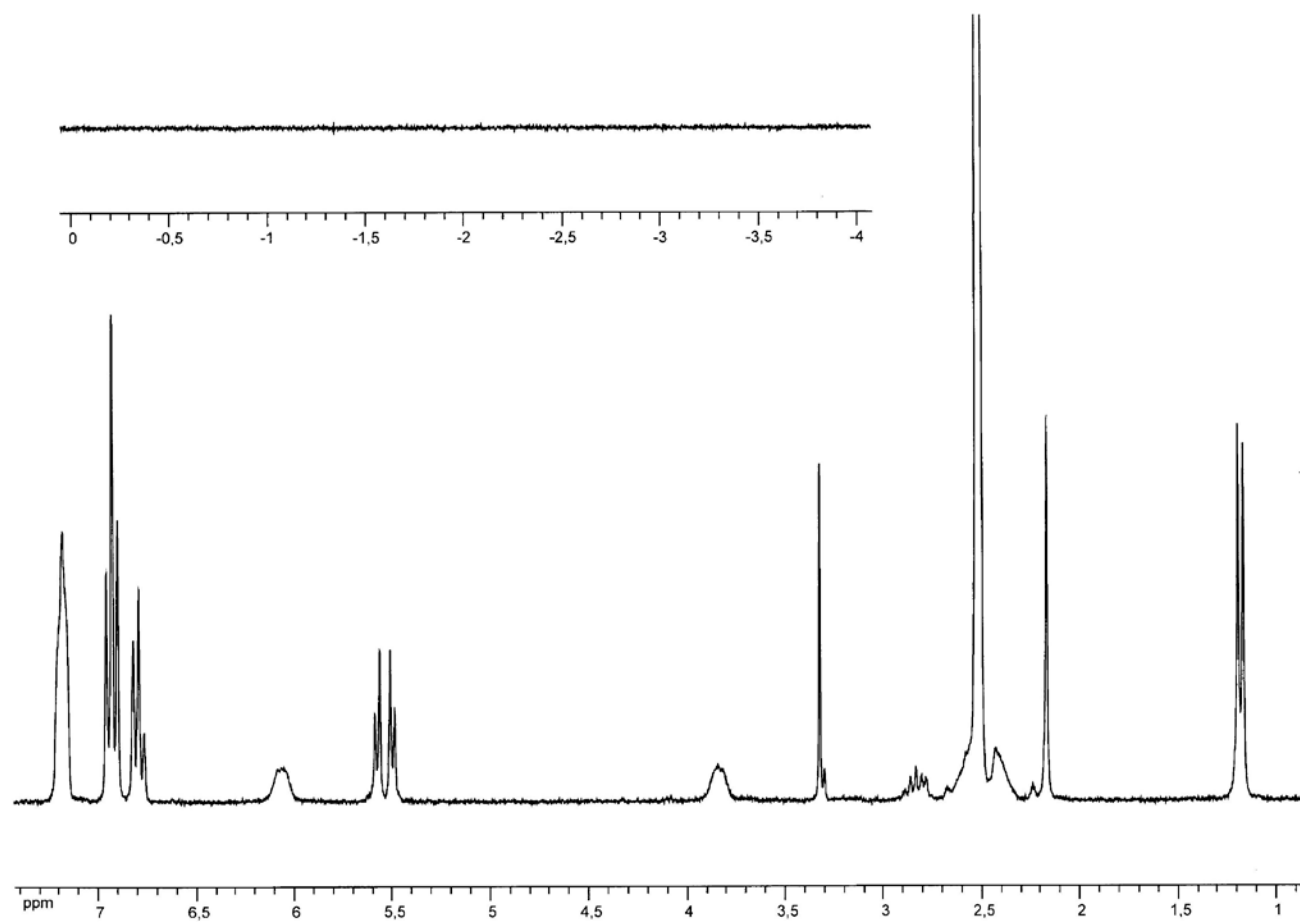

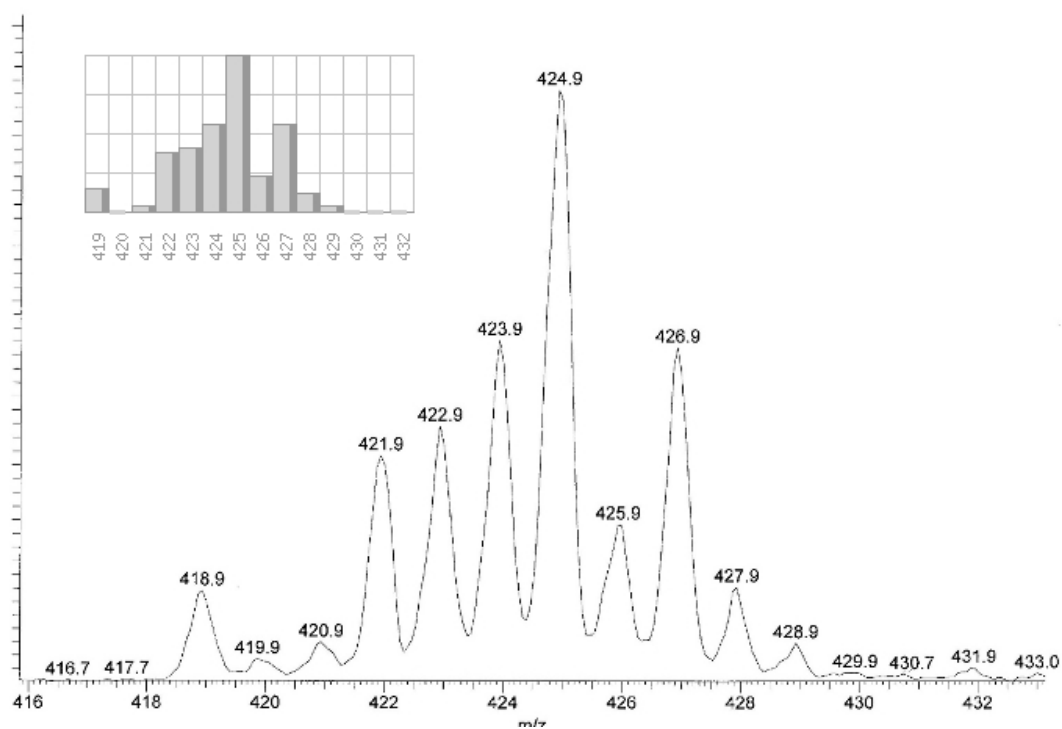

**Figure S3.** Isotopic distribution observed and simulated (insert) for complex  $[(p\text{-cymene})\text{Ru}(\text{bipy})(^{32}\text{SH})]^+$ .

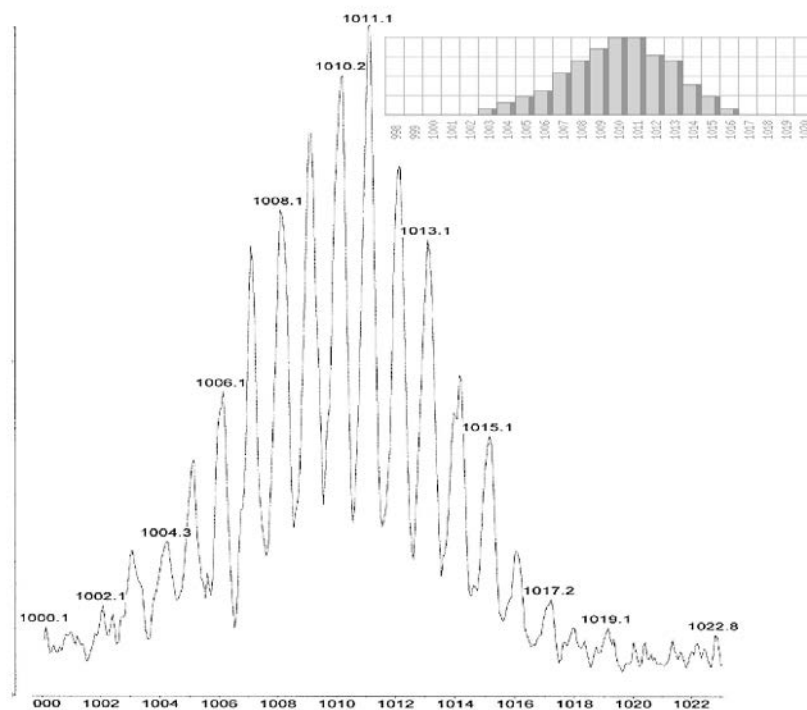

**Figure S4.** Isotopic distribution observed and simulated (insert) for complex  $[(p\text{-cymene})\text{Ru}(\text{en})(^{34}\text{S})_2^{32}\text{S}(\text{BPh}_4)]^+$ .
